# Supplementary material for: Transcriptome Landscape of Epithelial to Mesenchymal Transition of Human Stem Cell–Derived RPE
Source: PubMed Central journal article supplement (PMC8024778; doi:10.1167/iovs.62.4.1), 2021-04-01
Supplement: iovs-62-4-1_s003.pdf [file iovs-62-4-1_s003.pdf]

**Supplementary Table 1.** Quantitative real time PCR sequence list

| <b>Quantitative Real-Time PCR Primers</b> |   |                                   |                             |                |
|-------------------------------------------|---|-----------------------------------|-----------------------------|----------------|
| <b>Gene</b>                               |   | <b>Primer Sequence (5' to 3')</b> | <b>Annealing Temp (°C).</b> | <b>Source</b>  |
| <i>SNAI1</i>                              | F | TCGGAAGCCTAACTACAGCGA             | 60                          | This study     |
|                                           | R | AGATGAGCATTGGCAGCGAG              |                             |                |
| <i>FN1</i>                                | F | CGGTGGCTGTCAGTCAAAG               | 60                          | This study     |
|                                           | R | AAACCTCGGCTTCCTCCATAA             |                             |                |
| <i>ACTA2</i>                              | F | GTGTTGCCCTGAAGAGCAT               | 60                          | This study     |
|                                           | R | GCTGGGACATTGAAAGTCTCA             |                             |                |
| <i>CDH2</i>                               | F | AGCCAACCTTAACTGAGGAGT             | 60                          | This study     |
|                                           | R | GGCAAGTTGATTGGAGGGATG             |                             |                |
| <i>CDH1</i>                               | F | ATTTTCCCTCGACACCCGAT              | 60                          | This study     |
|                                           | R | TCCCAGGCGTAGACCAAGA               |                             |                |
| <i>VIM</i>                                | F | GACGCCATCAACACCGAGTT              | 60                          | This study     |
|                                           | R | CTTTGTCGTTGGTTAGCTGGT             |                             |                |
| <i>ZO-1</i>                               | F | CAACATACAGTGACGCTTCACA            | 60                          | This study     |
|                                           | R | CACTATTGACGTTTCCCCACTC            |                             |                |
| <i>BEST1</i>                              | F | CTGGGCTTCTACGTGACGC               | 60                          | This study     |
|                                           | R | TTGCTCGTCCTTGCCTTCG               |                             |                |
| <i>CREBBP</i>                             | F | GAGAGCAAGCAAACGGAGAG              | 60                          | Maruotti, 2013 |
|                                           | R | AAGGGAGGCAAACAGGACA               |                             |                |
| <i>FBXL12</i>                             | F | GCCTTGGTCAATCATCAG                | 60                          | Maruotti, 2013 |
|                                           | R | TTCTTCATCCGTCCTGTT                |                             |                |
| <i>GAPDH</i>                              | F | TAG CCAAATTCGTTGTCATAACC          | 60                          | This study     |
|                                           | R | CTGACTTCAACAGCGACACC              |                             |                |
| <i>OTX2</i>                               | F | ACCTTGA ACTCCACCTCT               | 56                          | Maruotti, 2013 |
|                                           | R | GCTTCTCTTCTCTGACTCTCTTTG          |                             |                |
| <i>RPE65</i>                              | F | TGCGTATG GACTTGGCTTGAATC          | 56                          | Maruotti, 2013 |
|                                           | R | TCCTGCTCCTGGGCTCACC               |                             |                |
| <i>RLBP1</i>                              | F | GCTGCTGGAGAATGAGGAAAC             | 56                          | Maruotti, 2013 |
|                                           | R | TGGCTGGTGGATGAAGTGG               |                             |                |
| <i>BEST1</i>                              | F | CAGTTCTTCTTCTATGTTG               | 54                          | Maruotti, 2013 |
|                                           | R | AATCATCATCATCCTCTC                |                             |                |
| <i>MITF</i>                               | F | TTCACGAGCGTCCTGTATGCAGAT          | 60                          | Meyer, 2009    |
|                                           | R | TTGCAAAGCAGGATCCATCAAGCC          |                             |                |
| <i>TYR</i>                                | F | ATTGGGACTGGCGGGATG                | 56                          | Maruotti, 2013 |
|                                           | R | GCATAAAGACTGATGGCTGTTG            |                             |                |

|               |   |                         |    |            |
|---------------|---|-------------------------|----|------------|
| <i>ZEB1</i>   | F | TTACACCTTTGCATACAGAACCC | 60 | This study |
|               | R | TTTACGATTACACCCAGACTGC  |    |            |
| <i>TGFB1</i>  | F | CTAATGGTGGAAACC CACAACG | 60 | This study |
|               | R | TATCGCCAGGAATTGTTGCTG   |    |            |
| <i>HEY1</i>   | F | CTGAGCTGAGAAGGCTGGT     | 60 | This study |
|               | R | CGAAATCCCAAACCTCCGATA   |    |            |
| <i>HES1</i>   | F | GTGAAGCACCTCCGGAAC      | 60 | This study |
|               | R | CGTTCATGCACTCGCTGA      |    |            |
| <i>JAG1</i>   | F | GAATGGCAACAAAACCTTG     | 60 | This study |
|               | R | AGCCTTGTCGGCAAATAG C    |    |            |
| <i>HMGA1</i>  | F | AAGCAAAAACAAGGGTGCTG    | 60 | This study |
|               | R | GAGGAAGAGGGCATCTC       |    |            |
| <i>HMGA2</i>  | F | GGGCCAGGAGGTAGTTTCTC    | 60 | This study |
|               | R | CCTCGGTGCACCATGTTTGGC   |    |            |
| <i>TWIST1</i> | F | GTCCGCAGTCTTACGAGGAG    | 60 | This study |
|               | R | GCTTGAGGGTCTGAATCTTGCT  |    |            |
| <i>NOTCH1</i> | F | CGCTGACGGAGTACAAGTG     | 60 | This study |
|               | R | GTAGGAGCCGACCTCGTTG     |    |            |
| <i>SNAI2</i>  | F | TGTGACAAGGAATATGTGAGCC  | 60 | This study |
|               | R | TGAGCCCTCAGATTTGACCTG   |    |            |
| <i>CTNNB1</i> | F | CATCTACACAGTTTGATGCTGCT | 60 | This study |
|               | R | GCAGTTTTGTGTCAGTTCAGGGA |    |            |
| <i>MICAL1</i> | F | TGCAGAGGAACAACGACAAG    | 60 | This study |
|               | R | AGCCCAGGAGGAAGACAAAT    |    |            |
| <i>MICAL2</i> | F | GGTCAAACCGGAGAGAATGA    | 60 | This study |
|               | R | GCTACGGCTGGAAAAGTTTG    |    |            |
| <i>MICAL3</i> | F | GATGGCTATGCAGGGGTAAA    | 60 | This study |
|               | R | TCCACATTTTGCTCATCAA     |    |            |
| <i>NRP1</i>   | F | ACCCAAGTGAAAAATGCGAATG  | 60 | This study |
|               | R | CACCATGTGTTTCGTAGTCAGA  |    |            |
| <i>RHOA</i>   | F | TATCGAGGTGGATGGAAAGC    | 60 | This study |
|               | R | ACTATCAGGGCTGTCGATGG    |    |            |
| <i>NEO1</i>   | F | TGGGTCAAAAATGGGGATATGG  | 60 | This study |
|               | R | ACTGAGGATGATGCTGGGAC    |    |            |
| <i>PLXNA3</i> | F | AACCTCGAGAGCAAGAACCA    | 60 | This study |
|               | R | GCTGCTTGATGGCACAGTAA    |    |            |
| <i>HRAS1</i>  | F | GTGGGGAACAAGTGTGACCT    | 60 | This study |
|               | R | CATCAGGAGGGTTCAGCTTC    |    |            |

|                |   |                         |    |            |
|----------------|---|-------------------------|----|------------|
| <i>RAPGDS1</i> | F | TGTGTGGATGCTGGATTGAT    | 60 | This study |
|                | R | AAGAGCTGCATTTTGGCAGT    |    |            |
| <i>RND1</i>    | F | TCATTGGCTGCAAGACAGAC    | 60 | This study |
|                | R | GTCCGAAAGATGCTGTGGAT    |    |            |
| <i>ADAM19</i>  | F | GAGGGGCGAGAAGTATGATCCT  | 60 | This study |
|                | R | TGGTTTGAGGGTTACCACTTGA  |    |            |
| <i>ADAMTS1</i> | F | ACGAGTGCCTACAGATCCT     | 60 | This study |
|                | R | CAGCGTACTTGGGAATCCAT    |    |            |
| <i>BMP7</i>    | F | TCGGCACCCATGTTTCATGC    | 60 | This study |
|                | R | CTTGGAAGATCAAACCGGAACT  |    |            |
| <i>EPHA4</i>   | F | TTCGCCCTATTTTCGTGTCTC   | 60 | This study |
|                | R | TGGTAGGTTCCGGATTGGTGTAT |    |            |
| <i>EPHB1</i>   | F | CTTACGAGGATCCCAACGAA    | 60 | This study |
|                | R | CAAACGCCCTTGTACACTT     |    |            |
| <i>EPHB2</i>   | F | AGTTCGGCCAAATTGTCAAC    | 60 | This study |
|                | R | TCTCCTTGTACTGCCCATC     |    |            |
| <i>EPHB3</i>   | F | GCTACAGCTGGGCTTGTCTT    | 60 | This study |
|                | R | GCAGCTTCTCCGTGTACTCC    |    |            |
| <i>FGFR2</i>   | F | GGTGGCTGAAAACGGGAAG     | 60 | This study |
|                | R | AGATGGGACCACACTTTCCATA  |    |            |
| <i>GNB3</i>    | F | ACACCTGGCCAAGATTTACG    | 60 | This study |
|                | R | TAGCTGTCCCACACGATCAG    |    |            |
| <i>GNG11</i>   | F | CCTGCCCTTCACATCGAAGAT   | 60 | This study |
|                | R | GGGGTTCTTGTCTTCTGGAAT   |    |            |
| <i>ITGA2</i>   | F | CCTGCCCTTCACATCGAAGAT   | 60 | This study |
|                | R | GGGGTTCTTGTCTTCTGGAAT   |    |            |
| <i>ITGA5</i>   | F | GCCTGTGGAGTACAAGTCCTT   | 60 | This study |
|                | R | AATTCGGGTGAAGTTATCTGTGG |    |            |
| <i>NGEF</i>    | F | ACCAAGAAGCTCTTCCACGA    | 60 | This study |
|                | R | TGAGAGGACGCCTTTAGCAT    |    |            |
| <i>NRP2</i>    | F | CCCTCACTTTGAAATCGAGAAGC | 60 | This study |
|                | R | CCTTGCCGTTTAGGCTGTAG    |    |            |
| <i>PDGFB</i>   | F | TCCCGAGGAGCTTTATGAGA    | 60 | This study |
|                | R | CTCAGCAATGGTCAGGGAAC    |    |            |
| <i>PIK3CD</i>  | F | TCGCTCCACCAAGAAGAAGT    | 60 | This study |
|                | R | CGGTCTTAAGCTGGTCCTTG    |    |            |
| <i>PLCH1</i>   | F | GGCAATTGTGGCTATGTCCT    | 60 | This study |
|                | R | AGTCTGGAGGTTTGGGGAGT    |    |            |
| <i>PRKCQ</i>   | F | CTTCAGAGAAGGTCCGGTTG    | 60 | This study |

|               |   |                         |    |            |
|---------------|---|-------------------------|----|------------|
|               | R | AACGGAGACTCCCAGGAAAT    |    |            |
| <i>SEMA3A</i> | F | AGACTCACTTGTACGCCTGTG   | 60 | This study |
|               | R | CCCAAGAGTTCGGAAGATAGCAA |    |            |
| <i>SEMA3D</i> | F | GGAAAGTGCAGACCATCGTT    | 60 | This study |
|               | R | CATCACAGAGTGCCGCTTTA    |    |            |
| <i>SEMA4A</i> | F | AGCCAGCGAGTTTGACTTCTT   | 60 | This study |
|               | R | CGTGGCGGATGACGTTGAA     |    |            |
| <i>SEMA4B</i> | F | GGGTGCAGACGCAGAGAAG     | 60 | This study |
|               | R | AGGTACACATGGGGCTGAAG    |    |            |
| <i>SEMA6D</i> | F | GGCGATCAAGACAACAGGAT    | 60 | This study |
|               | R | AAGAGGGCAACATTGGTTTG    |    |            |
| <i>UNC5D</i>  | F | AAGCCCTTCCCGAATCCATC    | 60 | This study |
|               | R | CCACCTGTTGCCTAGTAACATTG |    |            |
| <i>ABLIM1</i> | F | ACTGCATCTCTCCCTGGCTA    | 60 | This study |
|               | R | TGTTGGTCACCATGAGCATT    |    |            |
| <i>CXCL12</i> | F | AGAGCCAACGTCAAGCATCT    | 60 | This study |
|               | R | CTTTAGCTTCGGGTCAATGC    |    |            |
| <i>CXCR4</i>  | F | ACTACACCGAGGAAATGGGCT   | 60 | This study |
|               | R | CCCACAATGCCAGTTAAGAAGA  |    |            |
| <i>EFNA5</i>  | F | CGCTACGCTGTCTACTGGAAC   | 60 | This study |
|               | R | ATCGCCAGGAGGAACAGTAG    |    |            |
| <i>EFNB1</i>  | F | GAGGCAGACAACACTGTCAAG   | 60 | This study |
|               | R | AGCTTCAGTAGTAGGACCGTC   |    |            |
| <i>EFNB2</i>  | F | CTGCTGGATCAACCAGGAAT    | 60 | This study |
|               | R | CTGTTGCCGTCTGTGCTAGA    |    |            |
| <i>NTNG1</i>  | F | GCCCTTTGGGTTACGGTGT     | 60 | This study |
|               | R | TCTGTTAGCTCAATGGTTTTGCT |    |            |
| <i>PLXNB1</i> | F | TCTGCTCAGTGACCTGGTTG    | 60 | This study |
|               | R | GTGTATTTGGCCTTGCCCTGT   |    |            |
| <i>RGS3</i>   | F | GGCAAGGCAGACAAAATGAT    | 60 | This study |
|               | R | GAACTCAGTGCGAAGGAAGG    |    |            |
