# Supplementary material for: Transcriptome Landscape of Epithelial to Mesenchymal Transition of Human Stem Cell–Derived RPE
Source: PubMed Central journal article supplement (PMC8024778; doi:10.1167/iovs.62.4.1), 2021-04-01
Supplement: iovs-62-4-1_s004.pdf [file iovs-62-4-1_s004.pdf]

**Supplementary Table 2. Antibody Information**

| <b>Antibody</b>                      | <b>Source</b>  | <b>Dilution</b> |
|--------------------------------------|----------------|-----------------|
| Vimentin (D21H3) Rabbit mAb #5741    | Cell Signaling | 1/100           |
| ZO-1 (D7D12) Rabbit mAb #8193        | Cell Signaling | 1/500           |
| Claudin-1 (D5H1D) Rabbit mAb #13255  | Cell Signaling | 1/100           |
| E-Cadherin (24E10) Rabbit mAb #3195  | Cell Signaling | 1/200           |
| N-Cadherin (D4R1H) Rabbit mAb #13116 | Cell Signaling | 1/200           |
| TWIST1 Antibody #46702               | Cell Signaling | 1/100           |
| RLBP1 Mouse mAb #ab15051             | Abcam          | 1/100           |
| Tyrosinase Rabbit mAb #ab170905      | Abcam          | 1/100           |
| RPE65 Mouse mAb #ab13826             | Abcam          | 1/100           |
